# Supplementary material
Source: PubMed Central journal article supplement (PMC5105965)
Supplement: june-15-56-s001.pdf [file june-15-56-s001.pdf]

## Example of Data Collection Table

|                                                       | Food                         | Taste Intensity Rating                                                                                                                                                                                                                                                               |
|-------------------------------------------------------|------------------------------|--------------------------------------------------------------------------------------------------------------------------------------------------------------------------------------------------------------------------------------------------------------------------------------|
| <b>BEFORE<br/>consuming<br/>the Miracle<br/>Fruit</b> | <b>Lemon</b>                 | 0-----1-----2-----3-----4-----5-----6-----7-----8-----9-----10<br><b>Not Sour</b> <span style="float: right;"><b>Very Sour</b></span><br>0-----1-----2-----3-----4-----5-----6-----7-----8-----9-----10<br><b>Not Sweet</b> <span style="float: right;"><b>Very Sweet</b></span>     |
|                                                       | <b>Broccoli</b>              | 0-----1-----2-----3-----4-----5-----6-----7-----8-----9-----10<br><b>Not Bitter</b> <span style="float: right;"><b>Very Bitter</b></span><br>0-----1-----2-----3-----4-----5-----6-----7-----8-----9-----10<br><b>Not Sweet</b> <span style="float: right;"><b>Very Sweet</b></span> |
|                                                       | <b>Goldfish®<br/>Cracker</b> | 0-----1-----2-----3-----4-----5-----6-----7-----8-----9-----10<br><b>Not Salty</b> <span style="float: right;"><b>Very Salty</b></span><br>0-----1-----2-----3-----4-----5-----6-----7-----8-----9-----10<br><b>Not Sweet</b> <span style="float: right;"><b>Very Sweet</b></span>   |
|                                                       | <b>Jelly Bean</b>            | 0-----1-----2-----3-----4-----5-----6-----7-----8-----9-----10<br><b>Not Sweet</b> <span style="float: right;"><b>Very Sweet</b></span>                                                                                                                                              |
| <b>AFTER<br/>consuming<br/>the Miracle<br/>Fruit</b>  | <b>Lemon</b>                 | 0-----1-----2-----3-----4-----5-----6-----7-----8-----9-----10<br><b>Not Sour</b> <span style="float: right;"><b>Very Sour</b></span><br>0-----1-----2-----3-----4-----5-----6-----7-----8-----9-----10<br><b>Not Sweet</b> <span style="float: right;"><b>Very Sweet</b></span>     |
|                                                       | <b>Broccoli</b>              | 0-----1-----2-----3-----4-----5-----6-----7-----8-----9-----10<br><b>Not Bitter</b> <span style="float: right;"><b>Very Bitter</b></span><br>0-----1-----2-----3-----4-----5-----6-----7-----8-----9-----10<br><b>Not Sweet</b> <span style="float: right;"><b>Very Sweet</b></span> |
|                                                       | <b>Goldfish®<br/>Cracker</b> | 0-----1-----2-----3-----4-----5-----6-----7-----8-----9-----10<br><b>Not Salty</b> <span style="float: right;"><b>Very Salty</b></span><br>0-----1-----2-----3-----4-----5-----6-----7-----8-----9-----10<br><b>Not Sweet</b> <span style="float: right;"><b>Very Sweet</b></span>   |
|                                                       | <b>Jelly Bean</b>            | 0-----1-----2-----3-----4-----5-----6-----7-----8-----9-----10<br><b>Not Sweet</b> <span style="float: right;"><b>Very Sweet</b></span>                                                                                                                                              |

## **Laboratory Write-up Assignment**

Please answer the following questions.

### **I. Background:**

1. Describe the molecule in the Miracle Fruit that binds to the sweet receptors on a human tongue.
2. What part of the sweet receptor does this molecule bind to?
3. When and where was this molecule first extracted?
4. How does this molecule function and what is the aftereffect?

### **II. Results & Discussion:**

1. Overall, did your rating of taste intensity change from before to after the consumption of the Miracle Fruit? Please describe.
2. Did some tastes change more than others? If so, please explain why.
3. Were there individual differences in the perception of taste intensities prior to the consumption of the berry? Please describe.
4. Were there individual differences in the effect of the berry on altering perception of the different tastes? Please describe.
5. What were the similarities in the effect between group members?
6. What benefits do you think the Miracle Fruit might have to society?
7. Do you think the effect of the berry carries evolutionary significance? If so, what do you think it might be?
